# Supplementary material for: Stem cell-derived CAR T cells show greater persistence, trafficking, and viral control compared to ex vivo transduced CAR T cells
Source: PubMed Central journal article supplement — Mol Ther. 2024 Feb 27;32(4):1000–15. doi: 10.1016/j.ymthe.2024.02.026 (PMC11163220; doi:10.1016/j.ymthe.2024.02.026), 2024-02-27
Supplement: mmc1.pdf [file mmc1.pdf]

YMTHE, Volume 32

## **Supplemental Information**

**Stem cell-derived CAR T cells show greater  
persistence, trafficking, and viral control  
compared to *ex vivo* transduced CAR T cells**

**Mayra A. Carrillo, Anjie Zhen, Wenli Mu, Valerie Rezek, Heather Martin, Christopher W. Peterson, Hans-Peter Kiem, and Scott G. Kitchen**

# Supplemental Material

## Figure S1:

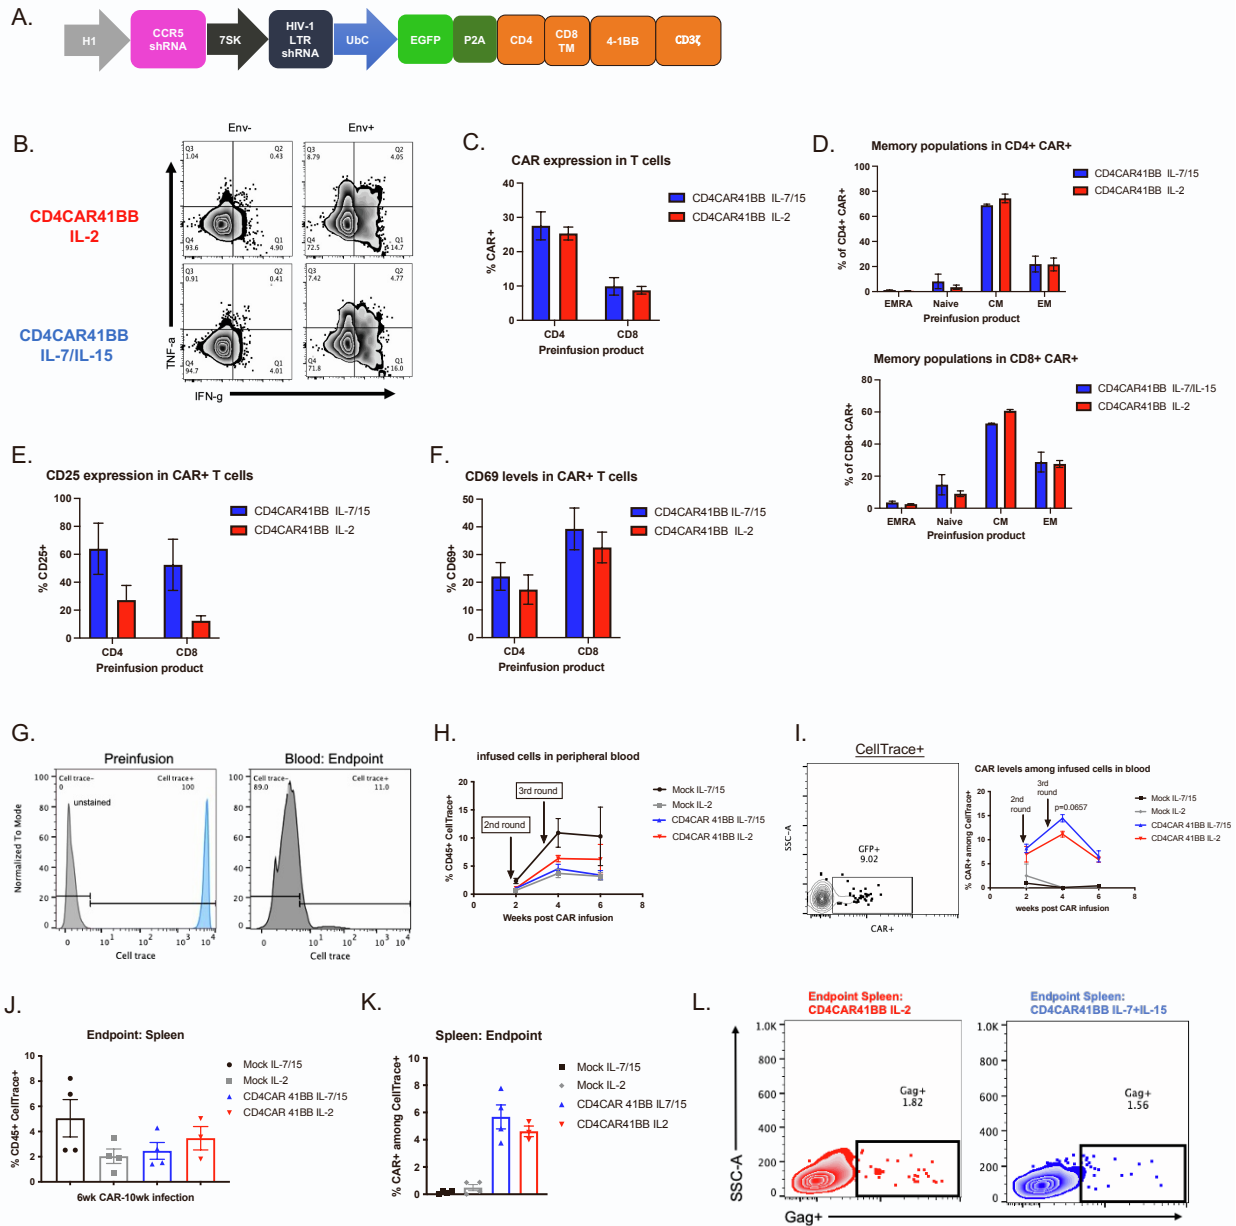

**Figure S1: In vitro function and in vivo tracking of CD4CAR41BB T cells cultured in IL-2 or IL-7/IL-15.** A) Schematic of lentiviral vector expressing CD4CAR41BB and protective shRNAs against CCR5 and HIV LTR. B) FACS plot showing upregulation of human cytokines in CD4CAR41BB T cells cultured in IL-2 or IL-7/IL-15 after co-incubation with stimulated ACH2 cells (Env+) or unstimulated ACH2 cells (Env-). T cells derived from healthy donors. C) CD4CAR41BB expression in CD4 and CD8 T cells (derived from uninfected BLT mice) cultured in IL-2 or IL-7/IL-15. D) Frequency of memory populations in CD4+ CAR+ T cells (top) and CD8+ CAR+ T cells (bottom) from (C) before infusion. E) Frequency of CD25+ in CAR+ CD4 and CD8 T cells cultured in IL-2 or IL-7/IL-15 from (C). F) Frequency of CD69+ in CAR+ CD4 and CD8 T cells cultured in IL-2 or IL-7/IL-15 from (C). G) Representative histogram plots showing CellTrace+ among CD45+ population before infusion (left) and after infusion at endpoint of study in peripheral blood. H) Percentage of human CD45+ CellTrace+ cells in peripheral blood of mock or CAR treated humanized mice. I) Representative FACS plot showing CAR+ (GFP+) gating in CellTrace+ population (left) and summary of percentage of CAR+ (GFP+) cells among CellTrace+ population in peripheral blood (right). J) Percentage of human CD45+ CellTrace+ cells in spleen. K) Percentage of CAR+ (GFP) cells among CellTrace+ in spleen. L) FACS plots (3-4 CAR mice combined) showing Gag expression in CAR+ (GFP+) cells cultured in IL-2 or IL-7/IL-15 in spleen. Error bars represent +/- SEM with n=3-4.

**Figure S2:**

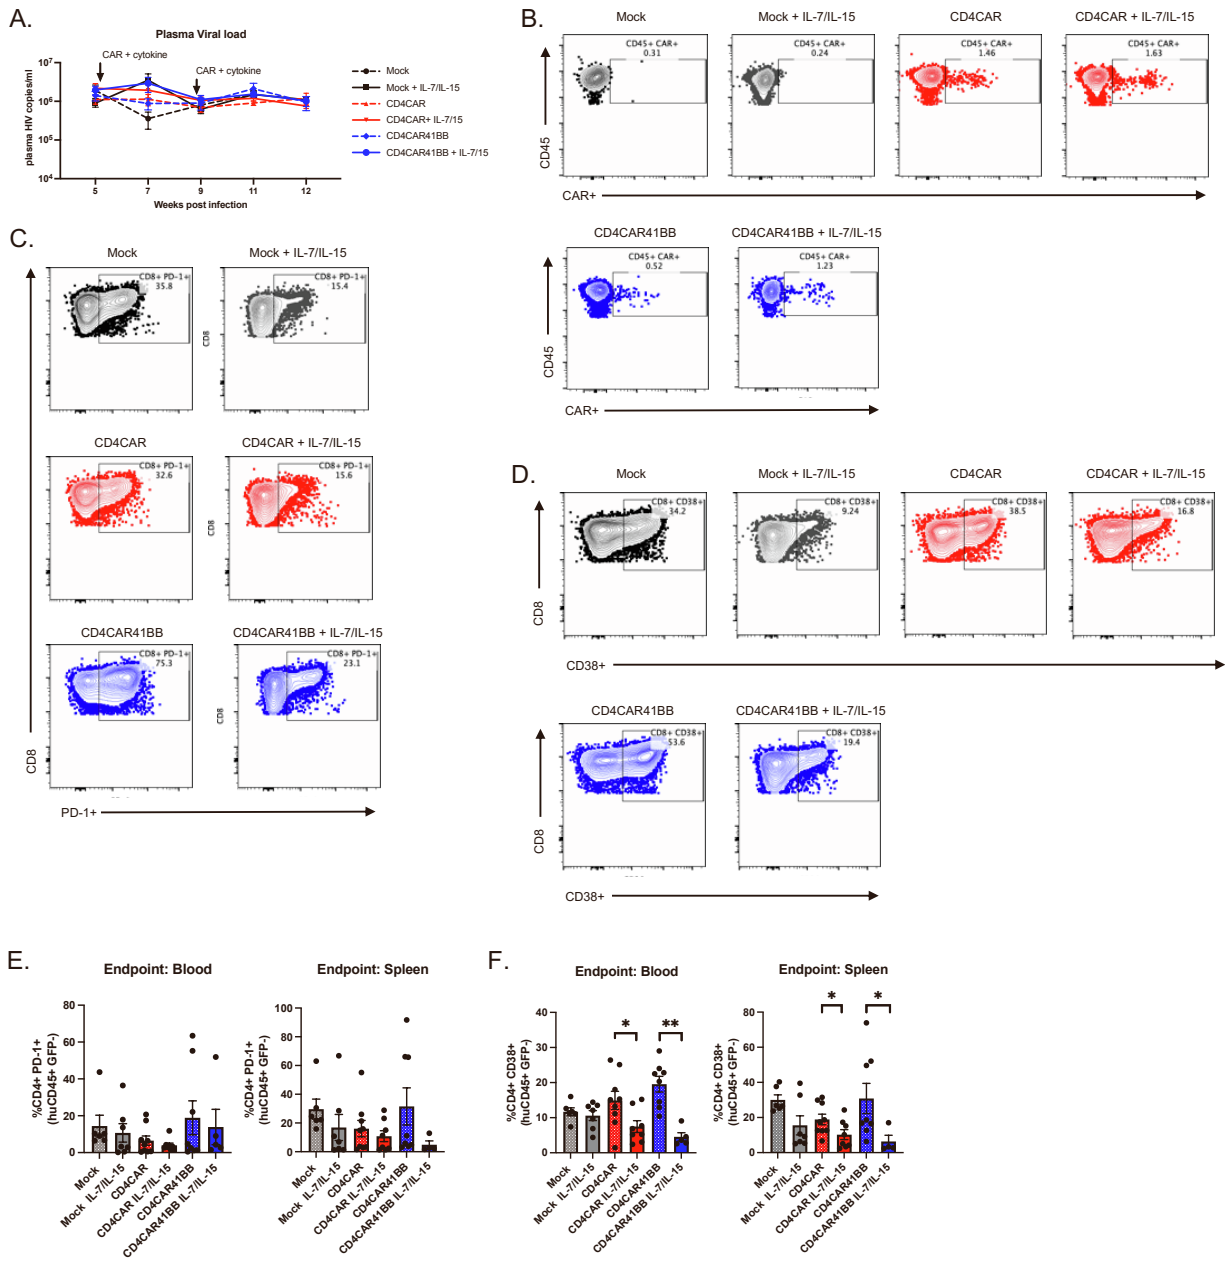

**Figure S2: IL-7 and IL-15 administration reduces expression of exhaustion and activation markers in CAR negative T cells.** A) Plasma HIV RNA copies measured by RT-PCR. Arrows indicate CAR T cell and cytokine treatment. B) Representative FACS plots showing percentage of CAR<sup>+</sup> T cells among total human CD45 detected in peripheral blood 2 weeks post infusion. C) Representative FACS plots showing PD-1 expression in CD8<sup>+</sup> CAR negative T cells in mice that received mock or CAR-T with or without cytokine treatments. D) Representative FACS plots showing CD38 expression in CD8<sup>+</sup> CAR negative T cells in mice that received mock or CAR-T with or without cytokine treatments. E) Percentage of CD4<sup>+</sup> CAR negative T cells expressing PD-1 in blood (left) and spleen (right) at endpoint of study. F) Percentage of CD4<sup>+</sup> CAR negative T cells expressing CD38 in blood (left) and spleen (right) at the endpoint of study. Error bars indicate SEM. \*\*p<0.01; \*p<0.05; Mann-Whitney test. n=4-6 per group with two independent experiments.

**Figure S3:**

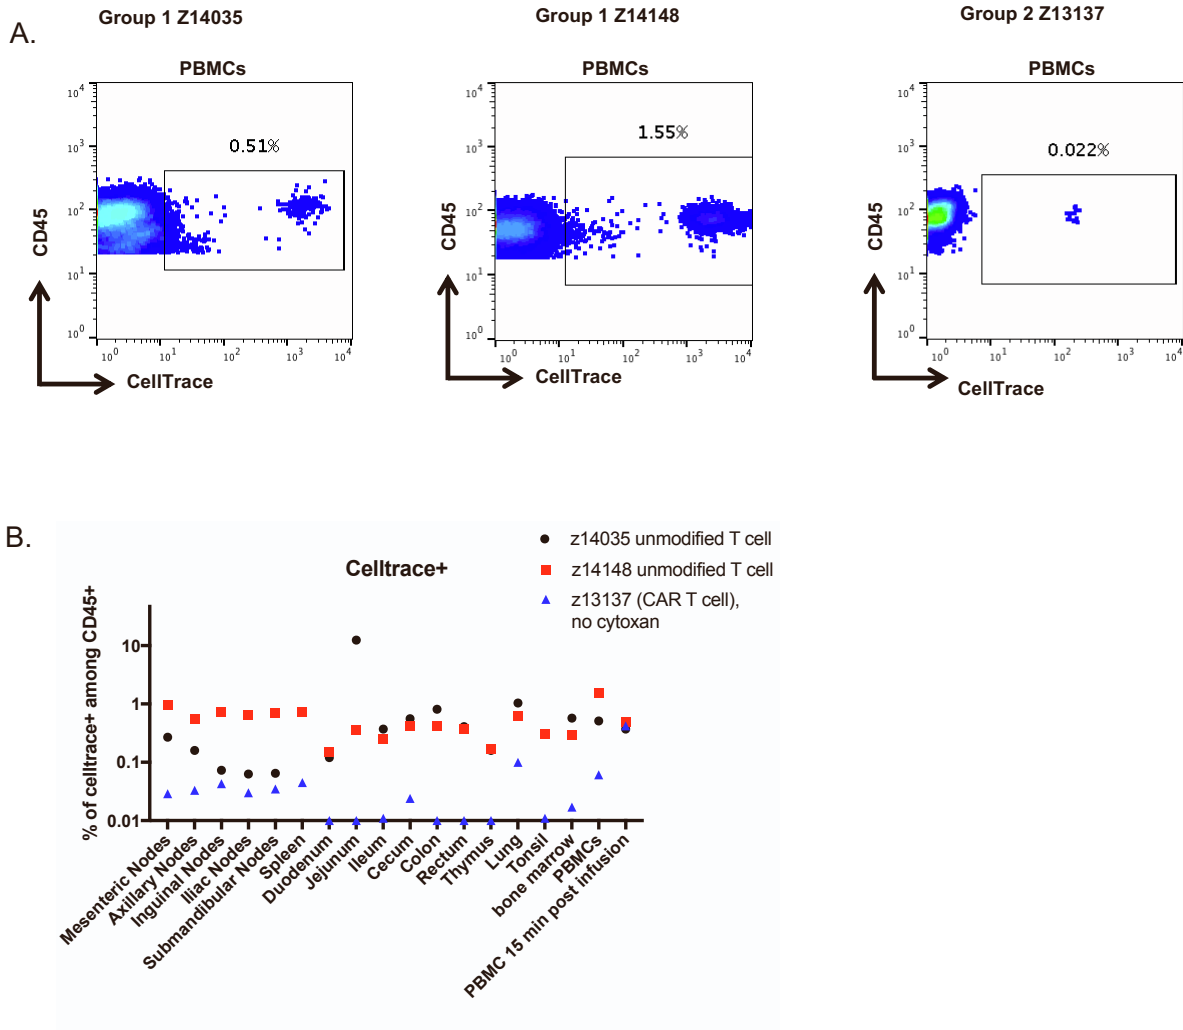

**Figure S3: Cyclophosphamide preconditioning enhances autologous adoptive T cell engraftment after infusion in SHIV infected NHP animals.** To track T cell trafficking, group 1 animals were infused with cell trace labeled T cells and group 2 animal was infused with cell trace labeled CAR-T cells 3 days before necropsy. A) Representative flow plot showing detection of cell trace+ cells in PBMCs of group 1 and group 2 animals. B) % of cell trace positive cells in lymphoid tissues.

**Figure S4:**

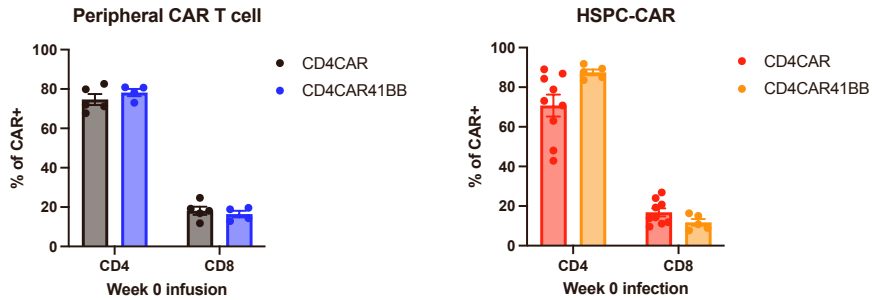

**Figure S4: Adoptive CAR T cell treated mice and stem cell CAR mice have similar engraftment levels of CD4 and CD8 CAR+ T cell.** Percentage of CD4 and CD8 CAR+ (GFP+) T cells in peripheral blood at week 0 of CAR T infusion (left) or week 0 of infection in CAR-stem cell mice (right). Error bars indicate SEM. n=4-5 per group with 1-2 independent experiments.

**Table S1. HSPC transplantation conditioning and cell doses.**

| Animal ID | 1. HSPC Transplantation |                         |          |                                           |                          |                         | 2. SHIV infection         | 3. T Cell Adoptive Transfer #1 |                               |                                 |                       | 3. T Cell Adoptive Transfer #2 |                               |                                 |                       | 4. Necropsy                                             |
|-----------|-------------------------|-------------------------|----------|-------------------------------------------|--------------------------|-------------------------|---------------------------|--------------------------------|-------------------------------|---------------------------------|-----------------------|--------------------------------|-------------------------------|---------------------------------|-----------------------|---------------------------------------------------------|
|           | Conditioning            | Mobilization            | Cells/kg | Infusion CFU<br>Lenti Gene<br>Marking (%) | Lenti+<br>CFU<br>(Count) | Acti+<br>CFU<br>(Count) | Years Post-<br>Transplant | Infusion Product               | Total Cell Dose<br>(cells/kg) | CAR+ Cell<br>Dose<br>(cells/kg) | CellTrace<br>Labeled? | Infusion Product               | Total Cell Dose<br>(cells/kg) | CAR+ Cell<br>Dose<br>(cells/kg) | CellTrace<br>Labeled? | Notes                                                   |
| Z14160    | TBI                     | G-CSF/SCF-Primed Marrow | 1.24E+07 | 43.53                                     | 37                       | 85                      | -                         | -                              | -                             | -                               | -                     | -                              | -                             | -                               | -                     | Acute kidney injury following HSPC transplantation      |
| Z14279    | TBI                     | G-CSF/SCF-Primed Marrow | 1.23E+07 | 85.71                                     | 6                        | 7                       | 1.32                      | -                              | -                             | -                               | -                     | -                              | -                             | -                               | -                     | Hemolytic-Uremic Syndrome (HUS)                         |
| Z14123    | TBI                     | G-CSF/SCF-Primed Marrow | 2.30E+07 | 6.90                                      | 6                        | 87                      | 1.22                      | CD4CAR T-Cell                  | 6.11E+07                      | 1.21E+06                        | No                    | -                              | -                             | -                               | -                     | Hemolytic-Uremic Syndrome (HUS)                         |
| Z14035    | TBI                     | G-CSF/SCF-Primed Marrow | 1.82E+07 | 69.32                                     | 61                       | 88                      | 1.34                      | CD4CAR T-Cell                  | 4.84E+07                      | 2.62E+06                        | No                    | Control T-Cell                 | 2.03E+07                      | -                               | Yes                   | Disseminated, moderate to extensive lymphoid reactivity |
| Z14148    | TBI                     | G-CSF/SCF-Primed Marrow | 1.67E+07 | 72.29                                     | 60                       | 83                      | 1.38                      | CD4CAR T-Cell                  | 4.99E+07                      | 1.48E+06                        | No                    | Control T-Cell                 | 6.75E+07                      | -                               | Yes                   | Disseminated, moderate to extensive lymphoid reactivity |
| Z13137    | TBI                     | G-CSF/SCF-Primed Marrow | 1.60E+07 | 44.44                                     | 36                       | 81                      | 1.53                      | CD4CAR T-Cell                  | 3.29E+07                      | 2.42E+06                        | Yes                   | CD4CAR T-Cell                  | 1.22E+08                      | 1.18E+07                        | Yes                   | N/A                                                     |
